# Supplementary material for: Access and Outcomes for Persons With Psychotic and Affective Disorders Receiving Vocational Rehabilitation Services
Source: Atypon-hosted journal article supplement (doi:10.1176/ps.62.7.pss6207_0796), 2011-07-01
Supplement: Salzer_ds.pdf [file Salzer_ds.pdf]

Cases Closed in 2005-2007 (N=1,397,687)

Excluding individuals:

- Younger than 18 and older than 65 (N= 142,244)
- With the following reasons for closure:
  - No disabling condition (N=17,016)
  - No impediment to employment (N=15,870)
  - No need for VR services (N=8,691)
- With impairment code of '*no impairment*' (N=8,314)
- With the following impairment causes:
  - Missing (N = 61,040)
  - Unknown (N = 86,620)
  - ADHD (N = 23,459)
  - Alcohol Abuse or Dependence (N = 32,645)
  - Anxiety Disorders (N = 24,650)
  - Drug Abuse or Dependence (N = 65,142)
  - Eating Disorders (N = 964)
  - Mental Illness (N = 26,105)
  - Personality Disorders (N = 19,019)
- With out-of-range values for key variables (N=83)

*Remaining Individuals*  
(N=865,825)

*Psychotic Disorders*  
(N=59,137)

*Physical, Sensory and  
Cognitive Disorders*  
(N=652,829)

*Affective Disorders*  
(N=153,859)
